# Supplementary material for: Differentially expressed myo-inositol monophosphatase gene (CaIMP) in chickpea (Cicer arietinum L.) encodes a lithium-sensitive phosphatase enzyme with broad substrate specificity and improves seed germination and seedling growth under abiotic stresses
Source: PubMed Central journal article supplement (PMC3871819; doi:10.1093/jxb/ert336), 2013-10-11
Supplement: supp_ert336_jexbot105965_file001.pdf [file supp_ert336_jexbot105965_file001.pdf]

Title: Differentially Expressed *myo*-Inositol Monophosphatase Gene (*CaIMP*) in Chickpea (*Cicer arietinum* L.) Encodes A Lithium Sensitive Phosphatase Enzyme with Broad Substrate Specificity and Improves Seed Germination and Seedling Growth under Abiotic Stresses

**Authors:**

**Name:** Saurabh C Saxena, Prafull Salvi, Harmeet Kaur, Pooja Verma, Bhanu Prakash Petla, Venkateswara Rao, Nitin Kamble and Manoj Majee

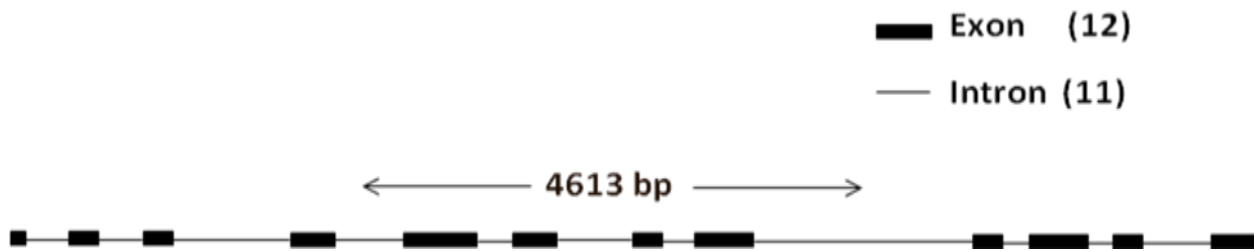

**Supplemental Figure S1:** Diagrammatic representation of *CaIMP* genomic structure. The boxes represent exons and the lines between them represent introns.

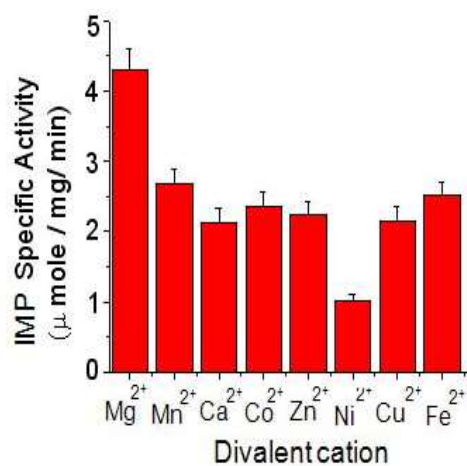

**Supplemental Figure S2.** Effect of divalent cation on the activity of purified recombinant CaIMP using inositol 1-phosphate as substrate. IMP activity was determined in presence of 5mM of each cation. In each case, 10μg purified protein was used. Specific activity was calculated μmole Pi released per mg of protein per minute. In each case values are mean ± SE of three replicates.

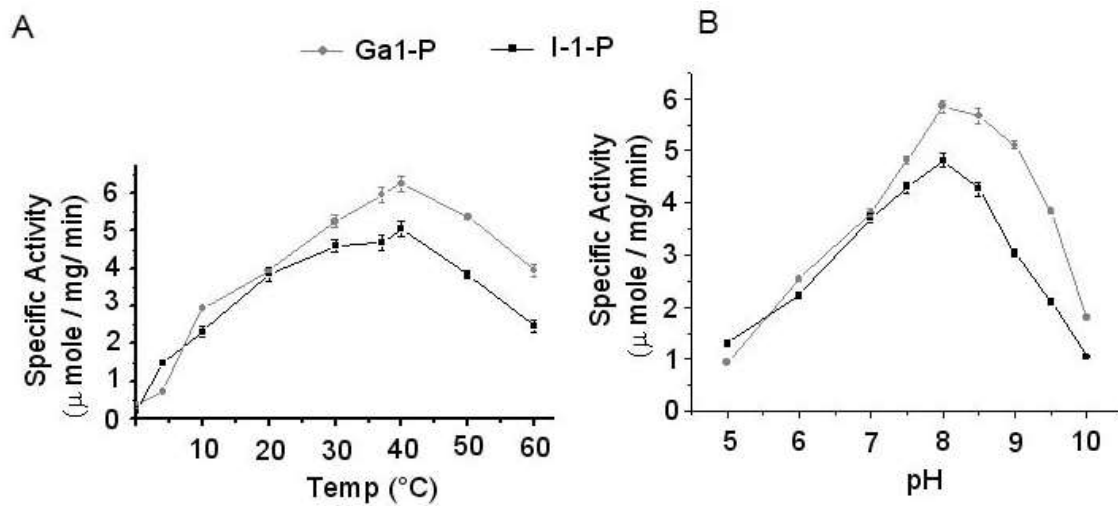

**Supplemental Figure S3. (A)** Effect of temperature on the activity of purified recombinant CaIMP. The specific activity was measured at different temperatures ranging from 0 to 60°C. In each case values are mean  $\pm$  SE of three replicates.

**(B)** Effect of pH on the activity of purified recombinant CaIMP. The specific activity was measured at 37°C at a pH range of 5 to 10. In each case, 10 $\mu$ g purified protein was used and values are mean  $\pm$  SE of three replicates.

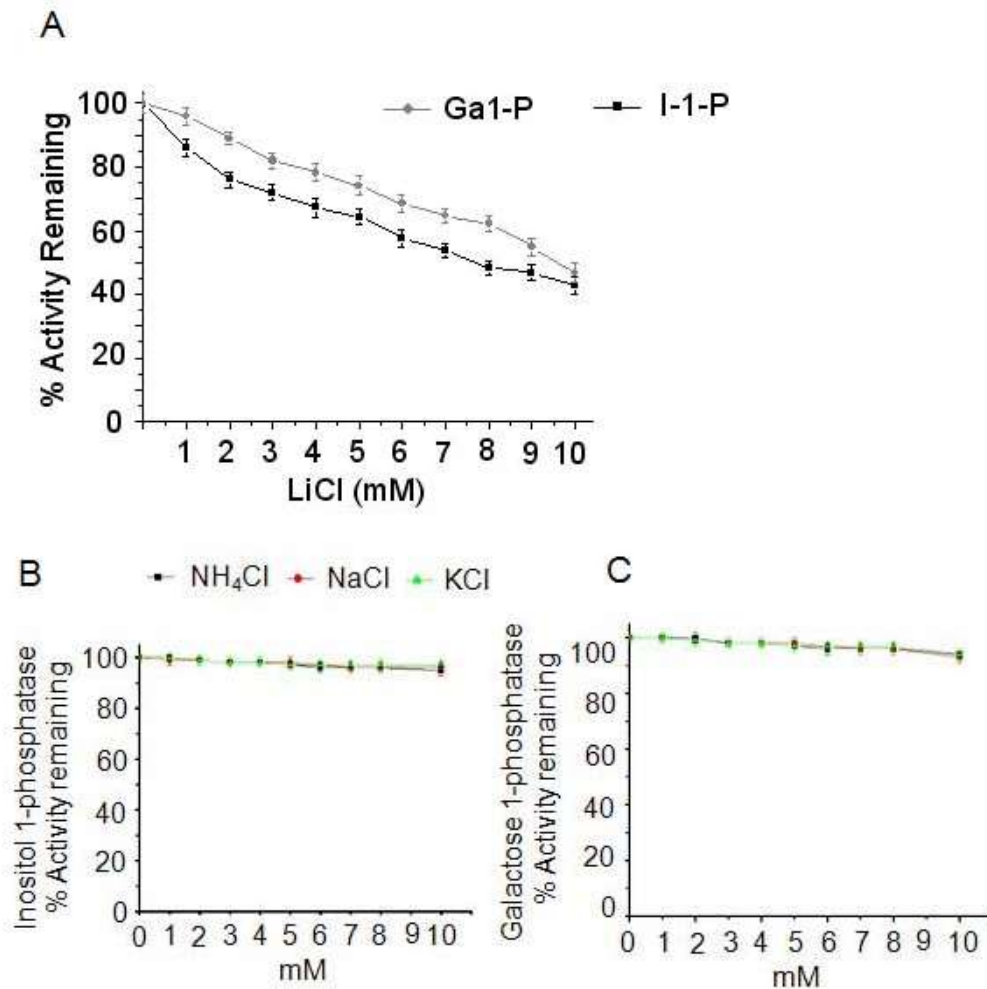

**Supplemental Figure S4.** (A) Effect of Li<sup>+</sup> on the activity of purified recombinant CaIMP. activity was assessed with increasing concentration of lithium chloride (LiCl) solution.

(B-C) Effect of monovalent cation (NH<sub>4</sub><sup>+</sup>, Na<sup>+</sup>, K<sup>+</sup>) on the activity of purified recombinant CaIMP. (B) IMP activity and (C) galactose 1-phosphatase activity was determined in presence of increasing concentration (0-10mM) of salt. In each case, 10μg purified protein was used. In each case values are mean ± SE of three replicates.



**Supplemental Figure S5.** Sequence of the 5' upstream regions of *CaIMP* gene. Nucleotide sequences representing major potential *cis*- regulatory elements are mentioned and underlined. Translational start codon (ATG) is highlighted.

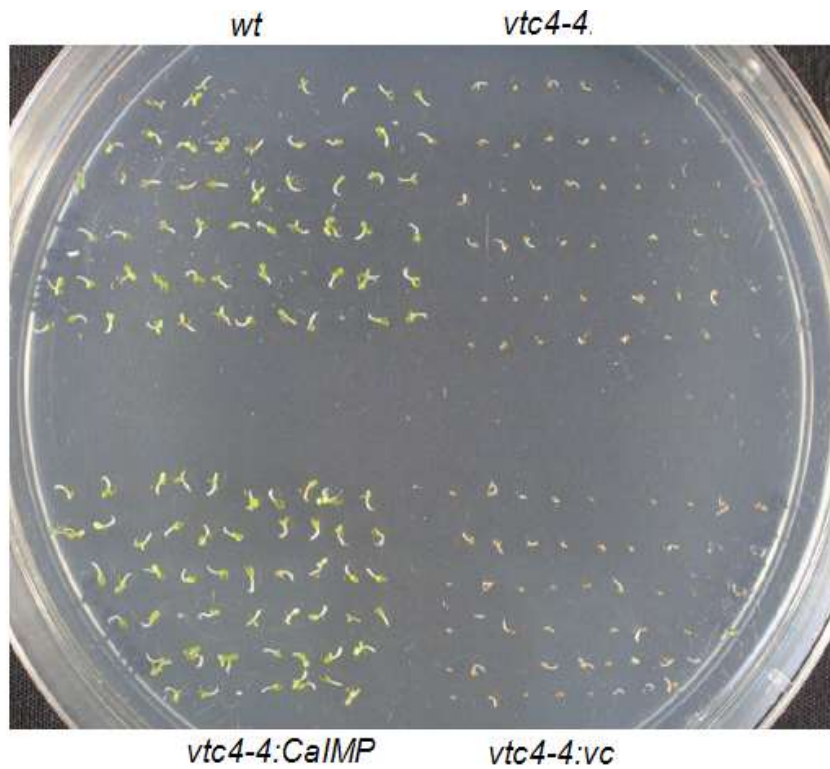

**Supplemental Figure S6.** Photograph showing the representative germination comparison of *wt*, *vtc4-4*, *vtc4-4:vc* and *vtc4-4:CaIMP* of *Arabidopsis thaliana* at 10°C

| Primer No. | Primer sequence (5'-3')         | Purpose                                                                                          |
|------------|---------------------------------|--------------------------------------------------------------------------------------------------|
| CaIMP1 F   | GGMACIACTAAYTTTGTACATGG         | <i>CaIMP</i> 3' RACE                                                                             |
| CaIMP2 F   | TGGIGCTGTCATTGTTAGRGAAGC        |                                                                                                  |
| CaIMP3R    | CATTCCGTTTGGCGCAGAGCATCAAC      | <i>CaIMP</i> 5' RACE                                                                             |
| CaIMP4R    | ATTCAAAAATGCACCTTGTCCACG        |                                                                                                  |
| CaIMP5 F   | GGAAGGATCAATAACAAACACACAG       | To clone full length <i>CaIMP</i> genomic sequence                                               |
| CaIMP6 R   | CCGACTAGTATCGGAATCAATAG         |                                                                                                  |
| CaIMP7F    | GGCATATGGTTGACAATGATTCACACTC    | To clone full length CDS of <i>CaIMP</i> in bacterial expression vector                          |
| CaIMP8R    | CTCGAGTTCCGTTTGGCGCAGAGCATC     |                                                                                                  |
| CaIMP9F    | AGCGTGTAGCTGCTTCAAACC           | Real time PCR in chickpea for <i>CaIMP1</i>                                                      |
| CaIMP10R   | GTTTGGCGCAGAGCATCA              |                                                                                                  |
| MM 160 F   | GCCCGCGACGTTGTGA                | Real time PCR for chickpea 18S (Endogenous control)                                              |
| MM 161 R   | CCTTGTTACGACTTCTCCTTCTCTA       |                                                                                                  |
| RTMIPS1F   | TGAGAATATGTTTGCTGCTGATGTT       | Real Time PCR in chickpea for <i>CaMIPS1</i>                                                     |
| RTMIPS1R   | AAAGCACCAACGAGCAAAGAC           |                                                                                                  |
| RTMIPS2F   | TGGATTGGCTCCTGAGAACA            | Real Time PCR in chickpea for <i>CaMIPS2</i>                                                     |
| RTMIPS2R   | CCCAAATTCCTAACTGAATCGTTAC       |                                                                                                  |
| CaIMP11F   | GGAGCTCATGGTTGACAATGATTCACACTC  | For preparing Hygromycin construct of <i>CaIMP</i> (mutant complementation)                      |
| CaIMP12 R  | CTCTAGATCATTCCGTTTGGCGCAGAGCATC |                                                                                                  |
| CaIMP13 F  | GAAGCTTATGGTTGACAATGATTCACACTC  | To clone full length CDS of <i>CaIMP</i> in plant expression vector for 35S overexpression lines |
| CaIMP12 R  | CTCTAGATCATTCCGTTTGGCGCAGAGCATC |                                                                                                  |
| CaIMP14 R  | TGATGTGGAATTGTAGAGAGAGAGAG      | For <i>CaIMP</i> genome walking                                                                  |
| CaIMP15 R  | AGAGAGAGATGATATGGAAGGAAGAG      |                                                                                                  |
| CaIMP16F   | GGCCCATCCATGTATGTTCTTGACC       | For cloning <i>CaIMP</i> promoter (1.5 Kb)                                                       |
| CaIMP14R   | TGATGTGGAATTGTAGAGAGAGAGAG      |                                                                                                  |

**Supplemental Table 1.** Primers used in this study
